# Supplementary material
Source: MDPI journal article supplement (https://www.mdpi.com/2073-445X/12/2/267)
Supplement: s1 [file s1]

**Table S1.** The measured lake areas in this study.

| Year | Lake             | Area (km <sup>2</sup> ) |
|------|------------------|-------------------------|
| 1972 | Lake LongmuCo    | 100.60                  |
| 1987 | Lake LongmuCo    | 103.19                  |
| 1988 | Lake LongmuCo    | 103.21                  |
| 1993 | Lake LongmuCo    | 103.38                  |
| 1994 | Lake LongmuCo    | 103.12                  |
| 1996 | Lake LongmuCo    | 103.06                  |
| 1997 | Lake LongmuCo    | 103.44                  |
| 1999 | Lake LongmuCo    | 103.17                  |
| 2000 | Lake LongmuCo    | 103.55                  |
| 2001 | Lake LongmuCo    | 103.80                  |
| 2002 | Lake LongmuCo    | 104.78                  |
| 2003 | Lake LongmuCo    | 104.80                  |
| 2004 | Lake LongmuCo    | 105.18                  |
| 2005 | Lake LongmuCo    | 105.52                  |
| 2006 | Lake LongmuCo    | 105.96                  |
| 2007 | Lake LongmuCo    | 106.48                  |
| 2008 | Lake LongmuCo    | 107.18                  |
| 2009 | Lake LongmuCo    | 107.43                  |
| 2010 | Lake LongmuCo    | 108.14                  |
| 2011 | Lake LongmuCo    | 108.33                  |
| 2012 | Lake LongmuCo    | 108.78                  |
| 2013 | Lake LongmuCo    | 109.33                  |
| 2014 | Lake LongmuCo    | 109.50                  |
| 2015 | Lake LongmuCo    | 110.09                  |
| 2016 | Lake LongmuCo    | 110.61                  |
| 2017 | Lake LongmuCo    | 110.86                  |
| 2018 | Lake LongmuCo    | 111.90                  |
| 2019 | Lake LongmuCo    | 112.29                  |
| 2020 | Lake LongmuCo    | 112.72                  |
| 2021 | Lake LongmuCo    | 113.48                  |
| 1972 | Lake Jiezechaqia | 108.35                  |
| 1987 | Lake Jiezechaqia | 109.00                  |
| 1988 | Lake Jiezechaqia | 109.11                  |
| 1993 | Lake Jiezechaqia | 109.31                  |
| 1994 | Lake Jiezechaqia | 109.33                  |
| 1996 | Lake Jiezechaqia | 109.01                  |
| 1997 | Lake Jiezechaqia | 109.52                  |
| 1999 | Lake Jiezechaqia | 110.44                  |
| 2000 | Lake Jiezechaqia | 112.06                  |
| 2001 | Lake Jiezechaqia | 112.20                  |
| 2002 | Lake Jiezechaqia | 113.68                  |
| 2003 | Lake Jiezechaqia | 113.91                  |
| 2004 | Lake Jiezechaqia | 113.58                  |
| 2005 | Lake Jiezechaqia | 114.50                  |
| 2006 | Lake Jiezechaqia | 115.33                  |
| 2007 | Lake Jiezechaqia | 115.62                  |
| 2008 | Lake Jiezechaqia | 116.23                  |
| 2009 | Lake Jiezechaqia | 116.59                  |

|      |                        |        |
|------|------------------------|--------|
| 2010 | Lake Jiezechaqia       | 117.16 |
| 2011 | Lake Jiezechaqia       | 117.66 |
| 2013 | Lake Jiezechaqia       | 118.10 |
| 2014 | Lake Jiezechaqia       | 118.75 |
| 2015 | Lake Jiezechaqia       | 119.27 |
| 2016 | Lake Jiezechaqia       | 119.23 |
| 2019 | Lake Jiezechaqia       | 120.88 |
| 2020 | Lake Jiezechaqia       | 121.56 |
| 2021 | Lake Jiezechaqia       | 122.31 |
| 1972 | Lake SongmuxiCo        | 25.40  |
| 1999 | Lake SongmuxiCo        | 26.76  |
| 2013 | Lake SongmuxiCo        | 30.11  |
| 2021 | Lake SongmuxiCo        | 32.89  |
| 1972 | Lake LumajiangdongCo   | 345.24 |
| 1999 | Lake LumajiangdongCo   | 358.87 |
| 2013 | Lake LumajiangdongCo   | 386.26 |
| 2021 | Lake LumajiangdongCo   | 414.01 |
| 2013 | Artificial Salt Lake 1 | 0.24   |
| 2014 | Artificial Salt Lake 1 | 1.33   |
| 2015 | Artificial Salt Lake 1 | 1.49   |
| 2016 | Artificial Salt Lake 1 | 1.45   |
| 2017 | Artificial Salt Lake 1 | 1.31   |
| 2020 | Artificial Salt Lake 1 | 0.46   |
| 2021 | Artificial Salt Lake 1 | 0.51   |
| 2013 | Artificial Salt Lake 2 | 2.67   |
| 2014 | Artificial Salt Lake 2 | 7.73   |
| 2015 | Artificial Salt Lake 2 | 9.68   |
| 2016 | Artificial Salt Lake 2 | 10.82  |
| 2017 | Artificial Salt Lake 2 | 12.02  |
| 2019 | Artificial Salt Lake 2 | 8.77   |
| 2020 | Artificial Salt Lake 2 | 8.83   |
| 2021 | Artificial Salt Lake 2 | 9.80   |

---
